# Supplementary material for: Sex-Biased Gene Expression and Isoform Profile of Brine Shrimp Artemia franciscana by Transcriptome Analysis
Source: MDPI journal article supplement (doi:10.3390/ani11092630), 2021-09-07
Supplement: s1 [file s1]

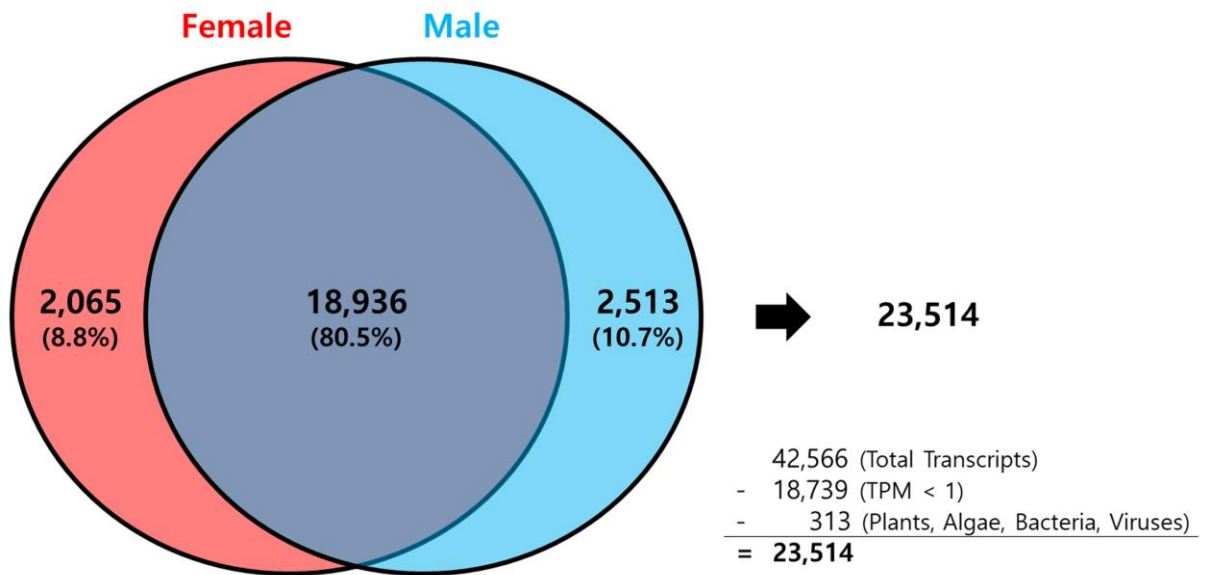

**Figure S1.** Venn diagram showing the number of transcripts in female and male *Artemia franciscana*. The number of transcripts remaining after filtering out is displayed in the bottom-right. Each color shows female-specific transcripts (red), male-specific transcripts (blue), and transcripts presented in both females and males (navy).
