# Supplementary material for: Sex-Biased Gene Expression and Isoform Profile of Brine Shrimp Artemia franciscana by Transcriptome Analysis
Source: MDPI journal article supplement (doi:10.3390/ani11092630), 2021-09-07
Supplement: s1 [file s1]

### ***DMRT1***

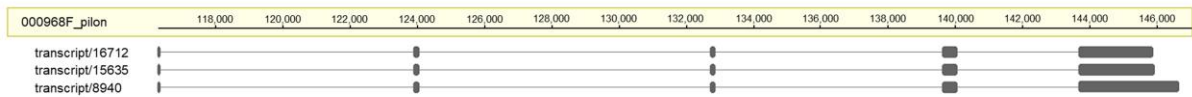

### ***Dsx***

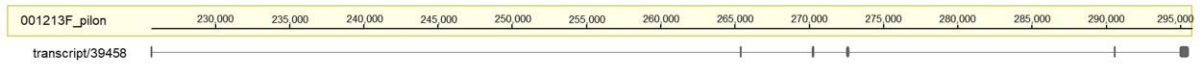

### ***Sad***

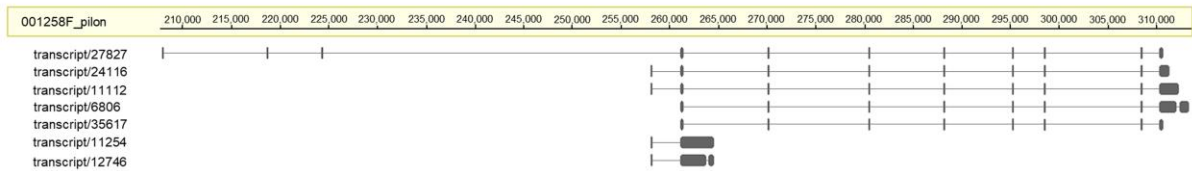

**Figure S2.** Illustration of isoforms of *DMRT1*, *Dsx*, and *Sad* genes in *Artemia franciscana*. Grey boxes represent exons and the horizontal lines connecting the boxes represent introns.
