# Supplementary material for: Sex-Biased Gene Expression and Isoform Profile of Brine Shrimp Artemia franciscana by Transcriptome Analysis
Source: Animals (Basel). 2021 Sep 7;11(9):2630. doi: 10.3390/ani11092630 (PMC8465105; doi:10.3390/ani11092630)
Supplement: Supplementary file 1 [file animals-11-02630-s001.zip]

Archive with 8 entries (8 files):
- Figure S1.pdf
- Figure S2.pdf
- Figure1.jpg
- Figure2.jpg
- Figure3.jpg
- Figure4.jpg
- Figure5.jpg
- Supple_Tables.xlsx
