# Supplementary material for: Sex-Biased Gene Expression and Isoform Profile of Brine Shrimp Artemia franciscana by Transcriptome Analysis
Source: Animals (Basel). 2021 Sep 7;11(9):2630. doi: 10.3390/ani11092630 (PMC8465105; doi:10.3390/ani11092630)
Supplement: Supplementary file 1 [file animals-11-02630-s001.zip › Supple_Tables.xlsx]

## Sheet: Table S1
Table S1. Statistics of Iso-Seq and RNA-Seq sequencing results for Artemia franciscana.
Iso-Seq			Count
CCS reads			678253
Number of CCS bases			2128734891
Mean of CCS read length			3138
Mean of number of passes			8
Transcript Clustering
Number of polished high-quality isoforms			42566
Number of polished low-quality isoforms			261
RNA-Seq	Yield (base)	Reads	Q30 (%)	Mean Q-score
Female-R1	5719104901	56624801	95.38	36.27
Female-R2	5719104901	56624801	93.68	35.93
Male-R1	5757097667	57000967	95.45	36.28
Male-R2	5757097667	57000967	93.48	35.88

## Sheet: Table S2
Table S2. Summary of annotations of Artemia franciscana transcriptome.
Annotation database	Annotated number	Percentage (%)
Number of transcripts	42566
NCBI (nr)	34193	80.3
Predicted proteins	36747	86.3
SwissProt_blastx	30716	72.2
SwissProt_blastp	29926	70.3
Pfam	29196	68.6
SignalP	36747	86.3
TMHMM	11002	25.8
eggNOG	27324	64.2
Kegg	28033	65.9
GO_blastx	30259	71.1
GO_blastp	29506	69.3
GO_Pfam	20440	48

## Sheet: Table S3
Table S3. Female-specific enriched Gene Ontology (GO) terms.
GO ID	GO Name	GO Category	P-Value	No. Transcripts
GO:0009416	response to light stimulus	BIOLOGICAL_PROCESS	0.0449345	42
GO:0050821	protein stabilization	BIOLOGICAL_PROCESS	0.000442758	32
GO:0034605	cellular response to heat	BIOLOGICAL_PROCESS	0.000141979	23
GO:0048512	circadian behavior	BIOLOGICAL_PROCESS	0.0357532	20
GO:0034620	cellular response to unfolded protein	BIOLOGICAL_PROCESS	0.0465467	19
GO:0045995	regulation of embryonic development	BIOLOGICAL_PROCESS	0.0433497	19
GO:0034728	nucleosome organization	BIOLOGICAL_PROCESS	0.0394476	18
GO:0042026	protein refolding	BIOLOGICAL_PROCESS	0.0024049	16
GO:0007156	homophilic cell adhesion via plasma membrane adhesion molecules	BIOLOGICAL_PROCESS	0.0164574	14
GO:0045292	mRNA cis splicing, via spliceosome	BIOLOGICAL_PROCESS	0.0366583	14
GO:0019935	cyclic-nucleotide-mediated signaling	BIOLOGICAL_PROCESS	0.0273226	13
GO:0051384	response to glucocorticoid	BIOLOGICAL_PROCESS	0.0273226	13
GO:0051085	chaperone cofactor-dependent protein refolding	BIOLOGICAL_PROCESS	0.0239685	13
GO:0003383	apical constriction	BIOLOGICAL_PROCESS	0.000147539	11
GO:0016318	ommatidial rotation	BIOLOGICAL_PROCESS	0.00683405	9
GO:0010907	positive regulation of glucose metabolic process	BIOLOGICAL_PROCESS	0.0117729	9
GO:1902751	positive regulation of cell cycle G2/M phase transition	BIOLOGICAL_PROCESS	0.0490005	9
GO:0045666	positive regulation of neuron differentiation	BIOLOGICAL_PROCESS	0.0357598	9
GO:0048821	erythrocyte development	BIOLOGICAL_PROCESS	0.0357598	9
GO:0050832	defense response to fungus	BIOLOGICAL_PROCESS	0.0383828	9
GO:0051131	chaperone-mediated protein complex assembly	BIOLOGICAL_PROCESS	2.96972e-06	8
GO:0061684	chaperone-mediated autophagy	BIOLOGICAL_PROCESS	0.0052326	7
GO:0051973	positive regulation of telomerase activity	BIOLOGICAL_PROCESS	0.013386	7
GO:0034394	protein localization to cell surface	BIOLOGICAL_PROCESS	0.0329849	7
GO:0010667	negative regulation of cardiac muscle cell apoptotic process	BIOLOGICAL_PROCESS	0.00049119	6
GO:0021955	central nervous system neuron axonogenesis	BIOLOGICAL_PROCESS	0.0013424	6
GO:0001178	regulation of transcriptional start site selection at RNA polymerase II promoter	BIOLOGICAL_PROCESS	0.0309725	6
GO:0010496	intercellular transport	BIOLOGICAL_PROCESS	0.0437729	6
GO:0090309	positive regulation of DNA methylation-dependent heterochromatin assembly	BIOLOGICAL_PROCESS	0.000820886	5
GO:0001502	cartilage condensation	BIOLOGICAL_PROCESS	0.00150892	5
GO:0006895	Golgi to endosome transport	BIOLOGICAL_PROCESS	0.0025431	5
GO:0007630	jump response	BIOLOGICAL_PROCESS	0.0404809	5
GO:0006308	DNA catabolic process	BIOLOGICAL_PROCESS	0.0489718	5
GO:0045429	positive regulation of nitric oxide biosynthetic process	BIOLOGICAL_PROCESS	0.0263547	5
GO:0097192	extrinsic apoptotic signaling pathway in absence of ligand	BIOLOGICAL_PROCESS	0.0489718	5
GO:0048935	peripheral nervous system neuron development	BIOLOGICAL_PROCESS	0.0404809	5
GO:0001881	receptor recycling	BIOLOGICAL_PROCESS	0.0404809	5
GO:0045743	positive regulation of fibroblast growth factor receptor signaling pathway	BIOLOGICAL_PROCESS	0.0404809	5
GO:1990809	endoplasmic reticulum tubular network membrane organization	BIOLOGICAL_PROCESS	0.0489718	5
GO:1901029	negative regulation of mitochondrial outer membrane permeabilization involved in apoptotic signaling pathway	BIOLOGICAL_PROCESS	0.00255559	4
GO:1990390	protein K33-linked ubiquitination	BIOLOGICAL_PROCESS	0.00471414	4
GO:0061086	negative regulation of histone H3-K27 methylation	BIOLOGICAL_PROCESS	0.00471414	4
GO:0060319	primitive erythrocyte differentiation	BIOLOGICAL_PROCESS	0.0120419	4
GO:0006048	UDP-N-acetylglucosamine biosynthetic process	BIOLOGICAL_PROCESS	0.0120419	4
GO:0035208	positive regulation of hemocyte proliferation	BIOLOGICAL_PROCESS	0.0120419	4
GO:0090136	epithelial cell-cell adhesion	BIOLOGICAL_PROCESS	0.0174699	4
GO:2001135	regulation of endocytic recycling	BIOLOGICAL_PROCESS	0.0242004	4
GO:0052652	cyclic purine nucleotide metabolic process	BIOLOGICAL_PROCESS	0.0322933	4
GO:0099622	cardiac muscle cell membrane repolarization	BIOLOGICAL_PROCESS	0.0322933	4
GO:0048915	posterior lateral line system development	BIOLOGICAL_PROCESS	0.0417809	4
GO:1905168	positive regulation of double-strand break repair via homologous recombination	BIOLOGICAL_PROCESS	0.0322933	4
GO:0040034	regulation of development, heterochronic	BIOLOGICAL_PROCESS	0.0242004	4
GO:0048790	maintenance of presynaptic active zone structure	BIOLOGICAL_PROCESS	0.0417809	4
GO:2000741	positive regulation of mesenchymal stem cell differentiation	BIOLOGICAL_PROCESS	0.000949448	3
GO:0021778	oligodendrocyte cell fate specification	BIOLOGICAL_PROCESS	0.00351808	3
GO:0021529	spinal cord oligodendrocyte cell differentiation	BIOLOGICAL_PROCESS	0.00351808	3
GO:0048022	negative regulation of melanin biosynthetic process	BIOLOGICAL_PROCESS	0.00815085	3
GO:1901911	adenosine 5'-(hexahydrogen pentaphosphate) catabolic process	BIOLOGICAL_PROCESS	0.00815085	3
GO:1901907	diadenosine pentaphosphate catabolic process	BIOLOGICAL_PROCESS	0.00815085	3
GO:1901909	diadenosine hexaphosphate catabolic process	BIOLOGICAL_PROCESS	0.00815085	3
GO:2000619	negative regulation of histone H4-K16 acetylation	BIOLOGICAL_PROCESS	0.00815085	3
GO:1902949	positive regulation of tau-protein kinase activity	BIOLOGICAL_PROCESS	0.00815085	3
GO:1902848	negative regulation of neuronal signal transduction	BIOLOGICAL_PROCESS	0.00815085	3
GO:0071543	diphosphoinositol polyphosphate metabolic process	BIOLOGICAL_PROCESS	0.00815085	3
GO:0042062	long-term strengthening of neuromuscular junction	BIOLOGICAL_PROCESS	0.00815085	3
GO:0090084	negative regulation of inclusion body assembly	BIOLOGICAL_PROCESS	0.0151138	3
GO:0045040	protein insertion into mitochondrial outer membrane	BIOLOGICAL_PROCESS	0.0151138	3
GO:1990519	pyrimidine nucleotide import into mitochondrion	BIOLOGICAL_PROCESS	0.0151138	3
GO:0106023	regulation of pupariation	BIOLOGICAL_PROCESS	0.0245325	3
GO:1905323	telomerase holoenzyme complex assembly	BIOLOGICAL_PROCESS	0.0245325	3
GO:0045823	positive regulation of heart contraction	BIOLOGICAL_PROCESS	0.0364235	3
GO:0120143	negative regulation of ecdysone receptor-mediated signaling pathway	BIOLOGICAL_PROCESS	0.0245325	3
GO:0016264	gap junction assembly	BIOLOGICAL_PROCESS	0.0364235	3
GO:2000726	negative regulation of cardiac muscle cell differentiation	BIOLOGICAL_PROCESS	0.0364235	3
GO:0044539	long-chain fatty acid import into cell	BIOLOGICAL_PROCESS	0.0364235	3
GO:0007168	receptor guanylyl cyclase signaling pathway	BIOLOGICAL_PROCESS	0.0245325	3
GO:0032332	positive regulation of chondrocyte differentiation	BIOLOGICAL_PROCESS	0.0245325	3
GO:0045463	R8 cell development	BIOLOGICAL_PROCESS	0.0096643	2
GO:0045191	regulation of isotype switching	BIOLOGICAL_PROCESS	0.027094	2
GO:0007348	regulation of syncytial blastoderm mitotic cell cycle	BIOLOGICAL_PROCESS	0.027094	2
GO:0001916	positive regulation of T cell mediated cytotoxicity	BIOLOGICAL_PROCESS	0.027094	2
GO:0042135	neurotransmitter catabolic process	BIOLOGICAL_PROCESS	0.027094	2
GO:0090275	negative regulation of somatostatin secretion	BIOLOGICAL_PROCESS	0.027094	2
GO:0043042	amino acid adenylylation by nonribosomal peptide synthase	BIOLOGICAL_PROCESS	0.027094	2
GO:0051082	unfolded protein binding	MOLECULAR_FUNCTION	0.000168579	32
GO:0032440	2-alkenal reductase [NAD(P)+] activity	MOLECULAR_FUNCTION	9.90091e-05	23
GO:0097718	disordered domain specific binding	MOLECULAR_FUNCTION	1.63368e-05	17
GO:0044183	protein folding chaperone	MOLECULAR_FUNCTION	0.00230427	12
GO:0051787	misfolded protein binding	MOLECULAR_FUNCTION	0.00966013	12
GO:0010485	H4 histone acetyltransferase activity	MOLECULAR_FUNCTION	0.0414614	9
GO:0004879	nuclear receptor activity	MOLECULAR_FUNCTION	0.0044368	8
GO:0070182	DNA polymerase binding	MOLECULAR_FUNCTION	0.000451737	7
GO:0031418	L-ascorbic acid binding	MOLECULAR_FUNCTION	0.00152705	7
GO:0030911	TPR domain binding	MOLECULAR_FUNCTION	0.00049119	6
GO:0005214	structural constituent of chitin-based cuticle	MOLECULAR_FUNCTION	0.000836427	6
GO:0047498	calcium-dependent phospholipase A2 activity	MOLECULAR_FUNCTION	0.00255559	4
GO:0019964	interferon-gamma binding	MOLECULAR_FUNCTION	0.00471414	4
GO:0031685	adenosine receptor binding	MOLECULAR_FUNCTION	0.00471414	4
GO:0004656	procollagen-proline 4-dioxygenase activity	MOLECULAR_FUNCTION	0.0417809	4
GO:0000298	endopolyphosphatase activity	MOLECULAR_FUNCTION	0.00815085	3
GO:0052842	inositol diphosphate pentakisphosphate diphosphatase activity	MOLECULAR_FUNCTION	0.00815085	3
GO:0052840	inositol diphosphate tetrakisphosphate diphosphatase activity	MOLECULAR_FUNCTION	0.00815085	3
GO:0034431	bis(5'-adenosyl)-hexaphosphatase activity	MOLECULAR_FUNCTION	0.00815085	3
GO:0008486	diphosphoinositol-polyphosphate diphosphatase activity	MOLECULAR_FUNCTION	0.00815085	3
GO:0034432	bis(5'-adenosyl)-pentaphosphatase activity	MOLECULAR_FUNCTION	0.00815085	3
GO:0015218	pyrimidine nucleotide transmembrane transporter activity	MOLECULAR_FUNCTION	0.0151138	3
GO:0016413	O-acetyltransferase activity	MOLECULAR_FUNCTION	0.0364235	3
GO:0050459	ethanolamine-phosphate phospho-lyase activity	MOLECULAR_FUNCTION	0.0364235	3
GO:0098847	sequence-specific single stranded DNA binding	MOLECULAR_FUNCTION	0.0364235	3
GO:0005355	glucose transmembrane transporter activity	MOLECULAR_FUNCTION	0.0364235	3
GO:0008381	mechanosensitive ion channel activity	MOLECULAR_FUNCTION	0.0364235	3
GO:0004711	ribosomal protein S6 kinase activity	MOLECULAR_FUNCTION	0.0364235	3
GO:0034386	4-aminobutyrate:2-oxoglutarate transaminase activity	MOLECULAR_FUNCTION	0.0096643	2
GO:0004344	glucose dehydrogenase activity	MOLECULAR_FUNCTION	0.027094	2
GO:0031711	bradykinin receptor binding	MOLECULAR_FUNCTION	0.027094	2
GO:0002094	polyprenyltransferase activity	MOLECULAR_FUNCTION	0.027094	2
GO:0045547	dehydrodolichyl diphosphate synthase activity	MOLECULAR_FUNCTION	0.027094	2
GO:0032145	succinate-semialdehyde dehydrogenase binding	MOLECULAR_FUNCTION	0.027094	2
GO:0003833	beta-alanyl-dopamine synthase activity	MOLECULAR_FUNCTION	0.027094	2
GO:0004736	pyruvate carboxylase activity	MOLECULAR_FUNCTION	0.027094	2
GO:0016324	apical plasma membrane	CELLULAR_COMPONENT	0.00773045	36
GO:0009986	cell surface	CELLULAR_COMPONENT	0.00175927	28
GO:0045169	fusome	CELLULAR_COMPONENT	0.00622439	19
GO:1904813	ficolin-1-rich granule lumen	CELLULAR_COMPONENT	6.96224e-05	17
GO:0043202	lysosomal lumen	CELLULAR_COMPONENT	0.00149843	8
GO:0030315	T-tubule	CELLULAR_COMPONENT	0.0236868	7
GO:0097433	dense body	CELLULAR_COMPONENT	0.0329849	7
GO:0016010	dystrophin-associated glycoprotein complex	CELLULAR_COMPONENT	0.01331	6
GO:0031463	Cul3-RING ubiquitin ligase complex	CELLULAR_COMPONENT	0.0309725	6
GO:0043209	myelin sheath	CELLULAR_COMPONENT	0.0309725	6
GO:1904724	tertiary granule lumen	CELLULAR_COMPONENT	0.0404809	5
GO:0097038	perinuclear endoplasmic reticulum	CELLULAR_COMPONENT	0.0489718	5
GO:0044294	dendritic growth cone	CELLULAR_COMPONENT	9.32356e-05	4
GO:0045170	spectrosome	CELLULAR_COMPONENT	0.00815085	3
GO:0071437	invadopodium	CELLULAR_COMPONENT	0.0151138	3
GO:0030289	protein phosphatase 4 complex	CELLULAR_COMPONENT	0.0364235	3
GO:0005899	insulin receptor complex	CELLULAR_COMPONENT	0.027094	2
GO:1904423	dehydrodolichyl diphosphate synthase complex	CELLULAR_COMPONENT	0.027094	2
GO:0032144	4-aminobutyrate transaminase complex	CELLULAR_COMPONENT	0.027094	2

## Sheet: Table S4
Table S4. Male-specific enriched Gene Ontology (GO) terms.
GO ID	GO Name	GO Category	P-Value	No. Transcripts
GO:0007411	axon guidance	BIOLOGICAL_PROCESS	0.00147719	85
GO:0000122	negative regulation of transcription by RNA polymerase II	BIOLOGICAL_PROCESS	0.0295654	75
GO:0016331	morphogenesis of embryonic epithelium	BIOLOGICAL_PROCESS	0.0277596	54
GO:0018105	peptidyl-serine phosphorylation	BIOLOGICAL_PROCESS	0.0358835	40
GO:0046777	protein autophosphorylation	BIOLOGICAL_PROCESS	0.0367581	37
GO:0007298	border follicle cell migration	BIOLOGICAL_PROCESS	0.00731837	36
GO:0001525	angiogenesis	BIOLOGICAL_PROCESS	0.0478723	30
GO:0048675	axon extension	BIOLOGICAL_PROCESS	0.0282288	29
GO:0007616	long-term memory	BIOLOGICAL_PROCESS	0.0121114	25
GO:0007435	salivary gland morphogenesis	BIOLOGICAL_PROCESS	0.00864052	23
GO:0016125	sterol metabolic process	BIOLOGICAL_PROCESS	0.0163084	19
GO:0019991	septate junction assembly	BIOLOGICAL_PROCESS	0.0273169	19
GO:0006809	nitric oxide biosynthetic process	BIOLOGICAL_PROCESS	0.00413812	17
GO:0006094	gluconeogenesis	BIOLOGICAL_PROCESS	0.00625459	17
GO:1903169	regulation of calcium ion transmembrane transport	BIOLOGICAL_PROCESS	0.0213123	16
GO:0051491	positive regulation of filopodium assembly	BIOLOGICAL_PROCESS	0.0393016	16
GO:0007026	negative regulation of microtubule depolymerization	BIOLOGICAL_PROCESS	0.00103281	15
GO:0051492	regulation of stress fiber assembly	BIOLOGICAL_PROCESS	0.0269905	15
GO:0030837	negative regulation of actin filament polymerization	BIOLOGICAL_PROCESS	0.0462127	15
GO:0002052	positive regulation of neuroblast proliferation	BIOLOGICAL_PROCESS	0.000704843	14
GO:0008258	head involution	BIOLOGICAL_PROCESS	0.00778693	14
GO:0030148	sphingolipid biosynthetic process	BIOLOGICAL_PROCESS	0.0331447	14
GO:0002027	regulation of heart rate	BIOLOGICAL_PROCESS	0.0027996	13
GO:1902476	chloride transmembrane transport	BIOLOGICAL_PROCESS	0.00667362	13
GO:0045887	positive regulation of synaptic growth at neuromuscular junction	BIOLOGICAL_PROCESS	0.0248976	13
GO:0014019	neuroblast development	BIOLOGICAL_PROCESS	0.00246834	12
GO:0046627	negative regulation of insulin receptor signaling pathway	BIOLOGICAL_PROCESS	0.00246834	12
GO:0051156	glucose 6-phosphate metabolic process	BIOLOGICAL_PROCESS	0.0168223	12
GO:0007443	Malpighian tubule morphogenesis	BIOLOGICAL_PROCESS	0.0168223	12
GO:1990830	cellular response to leukemia inhibitory factor	BIOLOGICAL_PROCESS	0.0321377	12
GO:0008156	negative regulation of DNA replication	BIOLOGICAL_PROCESS	0.00121985	11
GO:0061724	lipophagy	BIOLOGICAL_PROCESS	0.0184695	11
GO:0032007	negative regulation of TOR signaling	BIOLOGICAL_PROCESS	0.0406939	11
GO:0040018	positive regulation of multicellular organism growth	BIOLOGICAL_PROCESS	0.0406939	11
GO:0030727	germarium-derived female germ-line cyst formation	BIOLOGICAL_PROCESS	0.0426232	11
GO:0048844	artery morphogenesis	BIOLOGICAL_PROCESS	0.0426232	11
GO:0006024	glycosaminoglycan biosynthetic process	BIOLOGICAL_PROCESS	0.0481166	11
GO:0007365	periodic partitioning	BIOLOGICAL_PROCESS	0.0481166	11
GO:1904385	cellular response to angiotensin	BIOLOGICAL_PROCESS	0.000197732	10
GO:0007527	adult somatic muscle development	BIOLOGICAL_PROCESS	0.00931045	9
GO:0050729	positive regulation of inflammatory response	BIOLOGICAL_PROCESS	0.0140517	9
GO:0014068	positive regulation of phosphatidylinositol 3-kinase signaling	BIOLOGICAL_PROCESS	0.0455161	9
GO:0046329	negative regulation of JNK cascade	BIOLOGICAL_PROCESS	0.0455161	9
GO:0090579	dsDNA loop formation	BIOLOGICAL_PROCESS	2.61944e-05	8
GO:0050922	negative regulation of chemotaxis	BIOLOGICAL_PROCESS	0.00784525	8
GO:0071277	cellular response to calcium ion	BIOLOGICAL_PROCESS	0.0126242	8
GO:0030241	skeletal muscle myosin thick filament assembly	BIOLOGICAL_PROCESS	0.0156842	8
GO:0046959	habituation	BIOLOGICAL_PROCESS	0.0156842	8
GO:1902396	protein localization to bicellular tight junction	BIOLOGICAL_PROCESS	6.45551e-05	7
GO:0034214	protein hexamerization	BIOLOGICAL_PROCESS	0.00421273	7
GO:0035633	maintenance of blood-brain barrier	BIOLOGICAL_PROCESS	0.0078793	7
GO:0060361	flight	BIOLOGICAL_PROCESS	0.0134779	7
GO:0014067	negative regulation of phosphatidylinositol 3-kinase signaling	BIOLOGICAL_PROCESS	0.0171457	7
GO:0006646	phosphatidylethanolamine biosynthetic process	BIOLOGICAL_PROCESS	0.0214642	7
GO:0045056	transcytosis	BIOLOGICAL_PROCESS	0.0264817	7
GO:0060729	intestinal epithelial structure maintenance	BIOLOGICAL_PROCESS	0.0021199	6
GO:0015014	heparan sulfate proteoglycan biosynthetic process, polysaccharide chain biosynthetic process	BIOLOGICAL_PROCESS	0.0021199	6
GO:0034720	histone H3-K4 demethylation	BIOLOGICAL_PROCESS	0.0021199	6
GO:0045850	positive regulation of nurse cell apoptotic process	BIOLOGICAL_PROCESS	0.0021199	6
GO:0097150	neuronal stem cell population maintenance	BIOLOGICAL_PROCESS	0.00334437	6
GO:0150094	amyloid-beta clearance by cellular catabolic process	BIOLOGICAL_PROCESS	0.00725416	6
GO:0061723	glycophagy	BIOLOGICAL_PROCESS	0.00725416	6
GO:0098974	postsynaptic actin cytoskeleton organization	BIOLOGICAL_PROCESS	0.0101156	6
GO:0006656	phosphatidylcholine biosynthetic process	BIOLOGICAL_PROCESS	0.0101156	6
GO:0045819	positive regulation of glycogen catabolic process	BIOLOGICAL_PROCESS	0.0101156	6
GO:0034626	fatty acid elongation, polyunsaturated fatty acid	BIOLOGICAL_PROCESS	0.0136952	6
GO:0034625	fatty acid elongation, monounsaturated fatty acid	BIOLOGICAL_PROCESS	0.0136952	6
GO:1905314	semi-lunar valve development	BIOLOGICAL_PROCESS	0.0136952	6
GO:0019367	fatty acid elongation, saturated fatty acid	BIOLOGICAL_PROCESS	0.0136952	6
GO:0001938	positive regulation of endothelial cell proliferation	BIOLOGICAL_PROCESS	0.0180717	6
GO:0045661	regulation of myoblast differentiation	BIOLOGICAL_PROCESS	0.0180717	6
GO:0042761	very long-chain fatty acid biosynthetic process	BIOLOGICAL_PROCESS	0.0233164	6
GO:0045456	ecdysteroid biosynthetic process	BIOLOGICAL_PROCESS	0.0366475	6
GO:0003181	atrioventricular valve morphogenesis	BIOLOGICAL_PROCESS	0.044825	6
GO:0007284	spermatogonial cell division	BIOLOGICAL_PROCESS	0.000376437	5
GO:0061889	negative regulation of astrocyte activation	BIOLOGICAL_PROCESS	0.00184289	5
GO:0010899	regulation of phosphatidylcholine catabolic process	BIOLOGICAL_PROCESS	0.00184289	5
GO:1905167	positive regulation of lysosomal protein catabolic process	BIOLOGICAL_PROCESS	0.00184289	5
GO:1905907	negative regulation of amyloid fibril formation	BIOLOGICAL_PROCESS	0.00184289	5
GO:0010867	positive regulation of triglyceride biosynthetic process	BIOLOGICAL_PROCESS	0.00184289	5
GO:0034384	high-density lipoprotein particle clearance	BIOLOGICAL_PROCESS	0.00184289	5
GO:0061771	response to caloric restriction	BIOLOGICAL_PROCESS	0.00333108	5
GO:1903979	negative regulation of microglial cell activation	BIOLOGICAL_PROCESS	0.00333108	5
GO:0070508	cholesterol import	BIOLOGICAL_PROCESS	0.00552123	5
GO:0060307	regulation of ventricular cardiac muscle cell membrane repolarization	BIOLOGICAL_PROCESS	0.00552123	5
GO:0120081	positive regulation of microfilament motor activity	BIOLOGICAL_PROCESS	0.00856026	5
GO:0042159	lipoprotein catabolic process	BIOLOGICAL_PROCESS	0.00856026	5
GO:0034383	low-density lipoprotein particle clearance	BIOLOGICAL_PROCESS	0.00856026	5
GO:0051764	actin crosslink formation	BIOLOGICAL_PROCESS	0.0125855	5
GO:0072577	endothelial cell apoptotic process	BIOLOGICAL_PROCESS	0.0177194	5
GO:0051490	negative regulation of filopodium assembly	BIOLOGICAL_PROCESS	0.0177194	5
GO:0033280	response to vitamin D	BIOLOGICAL_PROCESS	0.0177194	5
GO:0030501	positive regulation of bone mineralization	BIOLOGICAL_PROCESS	0.024066	5
GO:0035279	mRNA cleavage involved in gene silencing by miRNA	BIOLOGICAL_PROCESS	0.024066	5
GO:0035024	negative regulation of Rho protein signal transduction	BIOLOGICAL_PROCESS	0.024066	5
GO:0071398	cellular response to fatty acid	BIOLOGICAL_PROCESS	0.024066	5
GO:0060213	positive regulation of nuclear-transcribed mRNA poly(A) tail shortening	BIOLOGICAL_PROCESS	0.024066	5
GO:0071108	protein K48-linked deubiquitination	BIOLOGICAL_PROCESS	0.024066	5
GO:0070935	3'-UTR-mediated mRNA stabilization	BIOLOGICAL_PROCESS	0.0317077	5
GO:0030536	larval feeding behavior	BIOLOGICAL_PROCESS	0.0407045	5
GO:0043520	regulation of myosin II filament assembly	BIOLOGICAL_PROCESS	0.000188029	4
GO:0060031	mediolateral intercalation	BIOLOGICAL_PROCESS	0.000188029	4
GO:0043004	cytoplasmic sequestering of CFTR protein	BIOLOGICAL_PROCESS	0.000852152	4
GO:0010360	negative regulation of anion channel activity	BIOLOGICAL_PROCESS	0.000852152	4
GO:0150111	regulation of transepithelial transport	BIOLOGICAL_PROCESS	0.000852152	4
GO:0042062	long-term strengthening of neuromuscular junction	BIOLOGICAL_PROCESS	0.0023182	4
GO:0060212	negative regulation of nuclear-transcribed mRNA poly(A) tail shortening	BIOLOGICAL_PROCESS	0.00890782	4
GO:0007384	specification of segmental identity, thorax	BIOLOGICAL_PROCESS	0.00890782	4
GO:0033189	response to vitamin A	BIOLOGICAL_PROCESS	0.0145598	4
GO:0007521	muscle cell fate determination	BIOLOGICAL_PROCESS	0.0145598	4
GO:0007496	anterior midgut development	BIOLOGICAL_PROCESS	0.0145598	4
GO:2000009	negative regulation of protein localization to cell surface	BIOLOGICAL_PROCESS	0.0145598	4
GO:1905232	cellular response to L-glutamate	BIOLOGICAL_PROCESS	0.0145598	4
GO:0006065	UDP-glucuronate biosynthetic process	BIOLOGICAL_PROCESS	0.0145598	4
GO:0071295	cellular response to vitamin	BIOLOGICAL_PROCESS	0.0220456	4
GO:0030321	transepithelial chloride transport	BIOLOGICAL_PROCESS	0.0220456	4
GO:0050907	detection of chemical stimulus involved in sensory perception	BIOLOGICAL_PROCESS	0.0220456	4
GO:0046672	positive regulation of compound eye retinal cell programmed cell death	BIOLOGICAL_PROCESS	0.0220456	4
GO:0031000	response to caffeine	BIOLOGICAL_PROCESS	0.0220456	4
GO:0035377	transepithelial water transport	BIOLOGICAL_PROCESS	0.031488	4
GO:0042531	positive regulation of tyrosine phosphorylation of STAT protein	BIOLOGICAL_PROCESS	0.031488	4
GO:0070986	left/right axis specification	BIOLOGICAL_PROCESS	0.031488	4
GO:0035562	negative regulation of chromatin binding	BIOLOGICAL_PROCESS	0.031488	4
GO:2000481	positive regulation of cAMP-dependent protein kinase activity	BIOLOGICAL_PROCESS	0.031488	4
GO:2000370	positive regulation of clathrin-dependent endocytosis	BIOLOGICAL_PROCESS	0.0429519	4
GO:0097202	activation of cysteine-type endopeptidase activity	BIOLOGICAL_PROCESS	0.0429519	4
GO:0090331	negative regulation of platelet aggregation	BIOLOGICAL_PROCESS	0.0429519	4
GO:0051966	regulation of synaptic transmission, glutamatergic	BIOLOGICAL_PROCESS	0.0429519	4
GO:0045705	negative regulation of salivary gland boundary specification	BIOLOGICAL_PROCESS	0.0429519	4
GO:0003097	renal water transport	BIOLOGICAL_PROCESS	0.0429519	4
GO:0062176	R-loop disassembly	BIOLOGICAL_PROCESS	0.0429519	4
GO:1902731	negative regulation of chondrocyte proliferation	BIOLOGICAL_PROCESS	0.00160657	3
GO:1901389	negative regulation of transforming growth factor beta activation	BIOLOGICAL_PROCESS	0.00160657	3
GO:0099156	cell-cell signaling via exosome	BIOLOGICAL_PROCESS	0.00586217	3
GO:0014816	skeletal muscle satellite cell differentiation	BIOLOGICAL_PROCESS	0.00586217	3
GO:0061586	positive regulation of transcription by transcription factor localization	BIOLOGICAL_PROCESS	0.00586217	3
GO:0003085	negative regulation of systemic arterial blood pressure	BIOLOGICAL_PROCESS	0.00586217	3
GO:0014908	myotube differentiation involved in skeletal muscle regeneration	BIOLOGICAL_PROCESS	0.00586217	3
GO:0014901	satellite cell activation involved in skeletal muscle regeneration	BIOLOGICAL_PROCESS	0.00586217	3
GO:0032534	regulation of microvillus assembly	BIOLOGICAL_PROCESS	0.00586217	3
GO:0090275	negative regulation of somatostatin secretion	BIOLOGICAL_PROCESS	0.00586217	3
GO:0061843	Sertoli cell barrier remodeling	BIOLOGICAL_PROCESS	0.0133772	3
GO:0061550	cranial ganglion development	BIOLOGICAL_PROCESS	0.0133772	3
GO:0061303	cornea development in camera-type eye	BIOLOGICAL_PROCESS	0.0133772	3
GO:0007425	epithelial cell fate determination, open tracheal system	BIOLOGICAL_PROCESS	0.0133772	3
GO:0019433	triglyceride catabolic process	BIOLOGICAL_PROCESS	0.0133772	3
GO:0070094	positive regulation of glucagon secretion	BIOLOGICAL_PROCESS	0.0133772	3
GO:0045649	regulation of macrophage differentiation	BIOLOGICAL_PROCESS	0.0133772	3
GO:1903416	response to glycoside	BIOLOGICAL_PROCESS	0.0244362	3
GO:0071217	cellular response to external biotic stimulus	BIOLOGICAL_PROCESS	0.0244362	3
GO:0071475	cellular hyperosmotic salinity response	BIOLOGICAL_PROCESS	0.0244362	3
GO:0060576	intestinal epithelial cell development	BIOLOGICAL_PROCESS	0.0244362	3
GO:1990416	cellular response to brain-derived neurotrophic factor stimulus	BIOLOGICAL_PROCESS	0.0244362	3
GO:0090390	phagosome acidification involved in apoptotic cell clearance	BIOLOGICAL_PROCESS	0.0244362	3
GO:1904867	protein localization to Cajal body	BIOLOGICAL_PROCESS	0.0244362	3
GO:0051312	chromosome decondensation	BIOLOGICAL_PROCESS	0.0244362	3
GO:0036146	cellular response to mycotoxin	BIOLOGICAL_PROCESS	0.0244362	3
GO:1904446	positive regulation of establishment of Sertoli cell barrier	BIOLOGICAL_PROCESS	0.0244362	3
GO:0099040	ceramide translocation	BIOLOGICAL_PROCESS	0.0244362	3
GO:0071923	negative regulation of cohesin loading	BIOLOGICAL_PROCESS	0.0244362	3
GO:0097068	response to thyroxine	BIOLOGICAL_PROCESS	0.0244362	3
GO:1905233	response to codeine	BIOLOGICAL_PROCESS	0.0244362	3
GO:1905231	cellular response to borneol	BIOLOGICAL_PROCESS	0.0244362	3
GO:1905237	response to cyclosporin A	BIOLOGICAL_PROCESS	0.0244362	3
GO:1905235	response to quercetin	BIOLOGICAL_PROCESS	0.0244362	3
GO:0014916	regulation of lung blood pressure	BIOLOGICAL_PROCESS	0.0244362	3
GO:0043215	daunorubicin transport	BIOLOGICAL_PROCESS	0.0244362	3
GO:0033231	carbohydrate export	BIOLOGICAL_PROCESS	0.0244362	3
GO:1901529	positive regulation of anion channel activity	BIOLOGICAL_PROCESS	0.0244362	3
GO:1990962	xenobiotic transport across blood-brain barrier	BIOLOGICAL_PROCESS	0.0244362	3
GO:1990963	establishment of blood-retinal barrier	BIOLOGICAL_PROCESS	0.0244362	3
GO:1990502	dense core granule maturation	BIOLOGICAL_PROCESS	0.0244362	3
GO:1900163	positive regulation of phospholipid scramblase activity	BIOLOGICAL_PROCESS	0.039083	3
GO:0071447	cellular response to hydroperoxide	BIOLOGICAL_PROCESS	0.039083	3
GO:0007539	primary sex determination, soma	BIOLOGICAL_PROCESS	0.039083	3
GO:0045821	positive regulation of glycolytic process	BIOLOGICAL_PROCESS	0.039083	3
GO:0032930	positive regulation of superoxide anion generation	BIOLOGICAL_PROCESS	0.039083	3
GO:0045725	positive regulation of glycogen biosynthetic process	BIOLOGICAL_PROCESS	0.039083	3
GO:0001780	neutrophil homeostasis	BIOLOGICAL_PROCESS	0.039083	3
GO:0046665	amnioserosa maintenance	BIOLOGICAL_PROCESS	0.039083	3
GO:0070779	D-aspartate import across plasma membrane	BIOLOGICAL_PROCESS	0.039083	3
GO:1903779	regulation of cardiac conduction	BIOLOGICAL_PROCESS	0.039083	3
GO:0048133	male germ-line stem cell asymmetric division	BIOLOGICAL_PROCESS	0.039083	3
GO:0071352	cellular response to interleukin-2	BIOLOGICAL_PROCESS	0.039083	3
GO:0014703	oscillatory muscle contraction	BIOLOGICAL_PROCESS	0.039083	3
GO:2000753	positive regulation of glucosylceramide catabolic process	BIOLOGICAL_PROCESS	0.039083	3
GO:2000755	positive regulation of sphingomyelin catabolic process	BIOLOGICAL_PROCESS	0.039083	3
GO:0023021	termination of signal transduction	BIOLOGICAL_PROCESS	0.039083	3
GO:1990961	xenobiotic detoxification by transmembrane export across the plasma membrane	BIOLOGICAL_PROCESS	0.039083	3
GO:0071000	response to magnetism	BIOLOGICAL_PROCESS	0.013722	2
GO:1902527	positive regulation of protein monoubiquitination	BIOLOGICAL_PROCESS	0.013722	2
GO:0014045	establishment of endothelial blood-brain barrier	BIOLOGICAL_PROCESS	0.013722	2
GO:0043117	positive regulation of vascular permeability	BIOLOGICAL_PROCESS	0.013722	2
GO:0042395	ecdysis, collagen and cuticulin-based cuticle	BIOLOGICAL_PROCESS	0.013722	2
GO:1990264	peptidyl-tyrosine dephosphorylation involved in inactivation of protein kinase activity	BIOLOGICAL_PROCESS	0.037953	2
GO:0010705	meiotic DNA double-strand break processing involved in reciprocal meiotic recombination	BIOLOGICAL_PROCESS	0.037953	2
GO:0051026	chiasma assembly	BIOLOGICAL_PROCESS	0.037953	2
GO:0030002	cellular anion homeostasis	BIOLOGICAL_PROCESS	0.037953	2
GO:1904274	tricellular tight junction assembly	BIOLOGICAL_PROCESS	0.037953	2
GO:0060903	positive regulation of meiosis I	BIOLOGICAL_PROCESS	0.037953	2
GO:0001973	G protein-coupled adenosine receptor signaling pathway	BIOLOGICAL_PROCESS	0.037953	2
GO:0035522	monoubiquitinated histone H2A deubiquitination	BIOLOGICAL_PROCESS	0.037953	2
GO:0035118	embryonic pectoral fin morphogenesis	BIOLOGICAL_PROCESS	0.037953	2
GO:0045591	positive regulation of regulatory T cell differentiation	BIOLOGICAL_PROCESS	0.037953	2
GO:0060244	negative regulation of cell proliferation involved in contact inhibition	BIOLOGICAL_PROCESS	0.037953	2
GO:0071376	cellular response to corticotropin-releasing hormone stimulus	BIOLOGICAL_PROCESS	0.037953	2
GO:0003232	bulbus arteriosus development	BIOLOGICAL_PROCESS	0.037953	2
GO:0007428	primary branching, open tracheal system	BIOLOGICAL_PROCESS	0.037953	2
GO:0071932	replication fork reversal	BIOLOGICAL_PROCESS	0.037953	2
GO:0051015	actin filament binding	MOLECULAR_FUNCTION	0.00550731	47
GO:0031267	small GTPase binding	MOLECULAR_FUNCTION	0.00615754	45
GO:0003774	motor activity	MOLECULAR_FUNCTION	0.000449674	38
GO:0001228	DNA-binding transcription activator activity, RNA polymerase II-specific	MOLECULAR_FUNCTION	0.00780515	34
GO:0005516	calmodulin binding	MOLECULAR_FUNCTION	0.0307153	24
GO:0050839	cell adhesion molecule binding	MOLECULAR_FUNCTION	0.0442233	24
GO:0004725	protein tyrosine phosphatase activity	MOLECULAR_FUNCTION	0.000885698	21
GO:0032440	2-alkenal reductase [NAD(P)+] activity	MOLECULAR_FUNCTION	0.0152125	19
GO:0030898	actin-dependent ATPase activity	MOLECULAR_FUNCTION	0.01172	12
GO:0004517	nitric-oxide synthase activity	MOLECULAR_FUNCTION	0.000686482	11
GO:0004715	non-membrane spanning protein tyrosine kinase activity	MOLECULAR_FUNCTION	0.0406939	11
GO:0004683	calmodulin-dependent protein kinase activity	MOLECULAR_FUNCTION	0.0216846	10
GO:0030145	manganese ion binding	MOLECULAR_FUNCTION	0.00266768	9
GO:0004346	glucose-6-phosphatase activity	MOLECULAR_FUNCTION	5.48192e-05	8
GO:0005109	frizzled binding	MOLECULAR_FUNCTION	0.0126242	8
GO:0071889	14-3-3 protein binding	MOLECULAR_FUNCTION	0.019246	8
GO:0008138	protein tyrosine/serine/threonine phosphatase activity	MOLECULAR_FUNCTION	0.00295652	7
GO:0102756	very-long-chain 3-ketoacyl-CoA synthase activity	MOLECULAR_FUNCTION	0.00725416	6
GO:0102336	3-oxo-arachidoyl-CoA synthase activity	MOLECULAR_FUNCTION	0.00725416	6
GO:0102338	3-oxo-lignoceronyl-CoA synthase activity	MOLECULAR_FUNCTION	0.00725416	6
GO:0102337	3-oxo-cerotoyl-CoA synthase activity	MOLECULAR_FUNCTION	0.00725416	6
GO:0004675	transmembrane receptor protein serine/threonine kinase activity	MOLECULAR_FUNCTION	0.0101156	6
GO:0009922	fatty acid elongase activity	MOLECULAR_FUNCTION	0.0136952	6
GO:0001540	amyloid-beta binding	MOLECULAR_FUNCTION	0.0180717	6
GO:0004698	calcium-dependent protein kinase C activity	MOLECULAR_FUNCTION	0.0233164	6
GO:0032027	myosin light chain binding	MOLECULAR_FUNCTION	0.0233164	6
GO:0004687	myosin light chain kinase activity	MOLECULAR_FUNCTION	0.0294912	6
GO:0005247	voltage-gated chloride channel activity	MOLECULAR_FUNCTION	0.0294912	6
GO:0005522	profilin binding	MOLECULAR_FUNCTION	0.00333108	5
GO:0030169	low-density lipoprotein particle binding	MOLECULAR_FUNCTION	0.00333108	5
GO:0005041	low-density lipoprotein particle receptor activity	MOLECULAR_FUNCTION	0.00552123	5
GO:0005158	insulin receptor binding	MOLECULAR_FUNCTION	0.00856026	5
GO:0043548	phosphatidylinositol 3-kinase binding	MOLECULAR_FUNCTION	0.024066	5
GO:0003841	1-acylglycerol-3-phosphate O-acyltransferase activity	MOLECULAR_FUNCTION	0.0407045	5
GO:0050509	N-acetylglucosaminyl-proteoglycan 4-beta-glucuronosyltransferase activity	MOLECULAR_FUNCTION	0.000852152	4
GO:0098973	structural constituent of postsynaptic actin cytoskeleton	MOLECULAR_FUNCTION	0.00490721	4
GO:0008093	cytoskeletal anchor activity	MOLECULAR_FUNCTION	0.00890782	4
GO:0003979	UDP-glucose 6-dehydrogenase activity	MOLECULAR_FUNCTION	0.0145598	4
GO:0030229	very-low-density lipoprotein particle receptor activity	MOLECULAR_FUNCTION	0.0145598	4
GO:0005159	insulin-like growth factor receptor binding	MOLECULAR_FUNCTION	0.031488	4
GO:0042768	ecdysteroid 2-hydroxylase activity	MOLECULAR_FUNCTION	0.00160657	3
GO:0033188	sphingomyelin synthase activity	MOLECULAR_FUNCTION	0.0133772	3
GO:0047493	ceramide cholinephosphotransferase activity	MOLECULAR_FUNCTION	0.0133772	3
GO:0043208	glycosphingolipid binding	MOLECULAR_FUNCTION	0.0133772	3
GO:0004420	hydroxymethylglutaryl-CoA reductase (NADPH) activity	MOLECULAR_FUNCTION	0.0244362	3
GO:0090555	phosphatidylethanolamine flippase activity	MOLECULAR_FUNCTION	0.0244362	3
GO:0042282	hydroxymethylglutaryl-CoA reductase activity	MOLECULAR_FUNCTION	0.0244362	3
GO:0004305	ethanolamine kinase activity	MOLECULAR_FUNCTION	0.0244362	3
GO:0004103	choline kinase activity	MOLECULAR_FUNCTION	0.0244362	3
GO:0099038	ceramide floppase activity	MOLECULAR_FUNCTION	0.0244362	3
GO:0004699	calcium-independent protein kinase C activity	MOLECULAR_FUNCTION	0.039083	3
GO:0005068	transmembrane receptor protein tyrosine kinase adaptor activity	MOLECULAR_FUNCTION	0.039083	3
GO:0070976	TIR domain binding	MOLECULAR_FUNCTION	0.039083	3
GO:0034647	histone demethylase activity (H3-trimethyl-K4 specific)	MOLECULAR_FUNCTION	0.039083	3
GO:0004838	L-tyrosine:2-oxoglutarate aminotransferase activity	MOLECULAR_FUNCTION	0.039083	3
GO:0031957	very long-chain fatty acid-CoA ligase activity	MOLECULAR_FUNCTION	0.039083	3
GO:0051371	muscle alpha-actinin binding	MOLECULAR_FUNCTION	0.039083	3
GO:0004415	hyalurononglucosaminidase activity	MOLECULAR_FUNCTION	0.037953	2
GO:0048273	mitogen-activated protein kinase p38 binding	MOLECULAR_FUNCTION	0.037953	2
GO:0032034	myosin II head/neck binding	MOLECULAR_FUNCTION	0.037953	2
GO:0016323	basolateral plasma membrane	CELLULAR_COMPONENT	0.00105068	41
GO:0016324	apical plasma membrane	CELLULAR_COMPONENT	0.0325171	39
GO:0030018	Z disc	CELLULAR_COMPONENT	0.020197	35
GO:0005925	focal adhesion	CELLULAR_COMPONENT	0.0114101	29
GO:0045178	basal part of cell	CELLULAR_COMPONENT	0.00188725	22
GO:0032154	cleavage furrow	CELLULAR_COMPONENT	0.00471028	22
GO:0030176	integral component of endoplasmic reticulum membrane	CELLULAR_COMPONENT	0.0108345	22
GO:0031941	filamentous actin	CELLULAR_COMPONENT	1.08979e-05	19
GO:0031672	A band	CELLULAR_COMPONENT	0.00547086	19
GO:0045169	fusome	CELLULAR_COMPONENT	0.041562	19
GO:0001725	stress fiber	CELLULAR_COMPONENT	0.00111227	14
GO:0070938	contractile ring	CELLULAR_COMPONENT	0.00423552	14
GO:0016328	lateral plasma membrane	CELLULAR_COMPONENT	0.029685	13
GO:0044291	cell-cell contact zone	CELLULAR_COMPONENT	0.0216846	10
GO:0005915	zonula adherens	CELLULAR_COMPONENT	0.00352804	9
GO:0005871	kinesin complex	CELLULAR_COMPONENT	0.0341062	9
GO:0030315	T-tubule	CELLULAR_COMPONENT	0.0233486	8
GO:1990316	Atg1/ULK1 kinase complex	CELLULAR_COMPONENT	0.00583403	7
GO:0005901	caveola	CELLULAR_COMPONENT	0.0322414	7
GO:0044305	calyx of Held	CELLULAR_COMPONENT	0.0136952	6
GO:0016460	myosin II complex	CELLULAR_COMPONENT	0.0294912	6
GO:0097443	sorting endosome	CELLULAR_COMPONENT	0.00552123	5
GO:0016027	inaD signaling complex	CELLULAR_COMPONENT	0.0125855	5
GO:0106037	apicomedial cortex	CELLULAR_COMPONENT	0.0177194	5
GO:0099143	presynaptic actin cytoskeleton	CELLULAR_COMPONENT	0.000852152	4
GO:0120220	basal body patch	CELLULAR_COMPONENT	0.000852152	4
GO:0005899	insulin receptor complex	CELLULAR_COMPONENT	0.000852152	4
GO:0045170	spectrosome	CELLULAR_COMPONENT	0.0023182	4
GO:0098871	postsynaptic actin cytoskeleton	CELLULAR_COMPONENT	0.00890782	4
GO:1904269	cell leading edge cell cortex	CELLULAR_COMPONENT	0.031488	4
GO:0031209	SCAR complex	CELLULAR_COMPONENT	0.031488	4
GO:0043190	ATP-binding cassette (ABC) transporter complex	CELLULAR_COMPONENT	0.00586217	3
GO:0043083	synaptic cleft	CELLULAR_COMPONENT	0.00586217	3
GO:0061689	tricellular tight junction	CELLULAR_COMPONENT	0.0244362	3
GO:0005827	polar microtubule	CELLULAR_COMPONENT	0.0244362	3
GO:0071821	FANCM-MHF complex	CELLULAR_COMPONENT	0.013722	2
GO:0005606	laminin-1 complex	CELLULAR_COMPONENT	0.013722	2
GO:0043240	Fanconi anaemia nuclear complex	CELLULAR_COMPONENT	0.013722	2
GO:0070418	DNA-dependent protein kinase complex	CELLULAR_COMPONENT	0.013722	2
GO:0035517	PR-DUB complex	CELLULAR_COMPONENT	0.037953	2
GO:1902636	kinociliary basal body	CELLULAR_COMPONENT	0.037953	2
GO:0070876	SOSS complex	CELLULAR_COMPONENT	0.037953	2
GO:0008091	spectrin	CELLULAR_COMPONENT	0.037953	2

## Sheet: Table S5
Table S5. Information of isoforms of DMRT1, Dsx, and Sad genes in Artemia franciscana.
Gene symbol	Gene description	Gene ID	Length (bp)	Female TPM	Male TPM
DMRT1	doublesex- and mab-3-related transcription factor 1	transcript/16712	3191	1	2.86
		transcript/15635	3254	0	1.3
		transcript/8940	3960	0.28	4.72
Dsx	doublesex	transcript/39458	1497	31.74	37.35
Sad	shadow	transcript/27827	2457	1.56	1.72
		transcript/24116	2687	0.64	2.28
		transcript/11112	3684	0.4	1.8
		transcript/6806	4319	1.86	14.7
		transcript/35617	1865	0.61	18.01
		transcript/11254	3682	0.28	1.67
		transcript/12746	3524	0.17	1.12
